# Supplementary material for: Slower diffusion and anomalous association of R453W lamin A protein alter nuclear architecture in AD-EDMD
Source: Royal Society of Chemistry journal article supplement (doi:10.1039/d2ra05620h), 2022-01-01
Supplement: d2ra05620h4.pdf [file d2ra05620h4.pdf]

## Supplementary Information:

# Slower Diffusion and Anomalous Association of R453W lamin A Protein Alter Nuclear Architecture in AD-EDMD

Chandrayee Mukherjee<sup>1\*\*</sup>, Duhita Sengupta<sup>1\*\*</sup>, Lakshmi Maganti<sup>2\*\*</sup>, M. Mahendar<sup>1</sup>,  
Dhananjay Bhattacharyya<sup>2\*</sup> & Kaushik Sengupta<sup>1\*</sup>

1. Biophysics & Structural Genomics Division, Saha Institute of Nuclear Physics, A CI of Homi Bhabha National Institute, 1/AF Bidhannagar, Kolkata-700064, West Bengal India
2. Computational Science Division, Saha Institute of Nuclear Physics, A CI of Homi Bhabha National Institute, 1/AF Bidhannagar, Kolkata-700064, West Bengal, India <sup>\*Correspondence</sup> should be addressed to: [kaushik.sengupta@saha.ac.in](mailto:kaushik.sengupta@saha.ac.in), [dhananjay.bhattacharyya@saha.ac.in](mailto:dhananjay.bhattacharyya@saha.ac.in)

\*\*Authors contributed equally

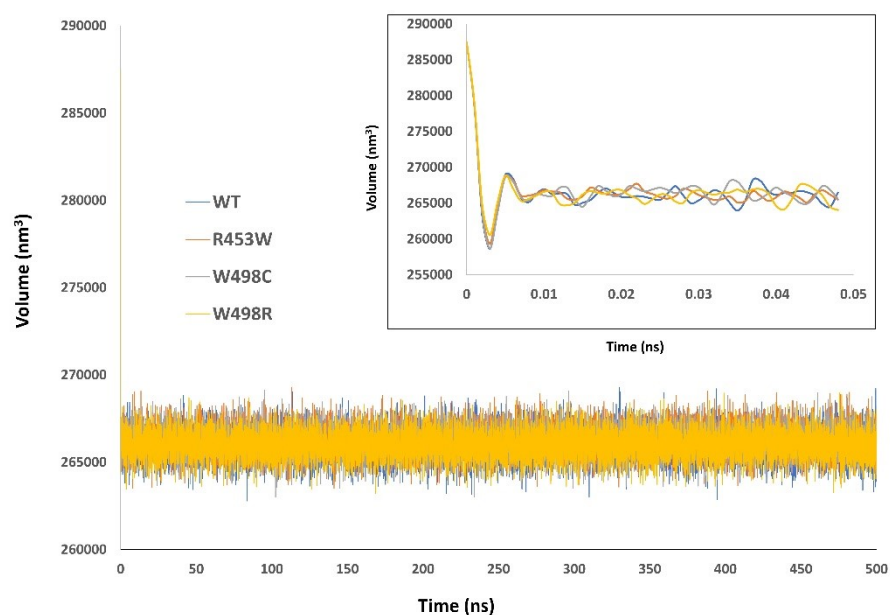

**Supplementary Figure 1.** Alteration of the volume of the periodic box during MD simulation with time are shown here for the wild type and the mutant Ig fold lamin A proteins. The inset shows volume change with time in the beginning of production run.
