# Supplementary figures and images for: Slower diffusion and anomalous association of R453W lamin A protein alter nuclear architecture in AD-EDMD
Source: Royal Society of Chemistry journal article supplement (doi:10.1039/d2ra05620h), 2022-01-01

11.8.2020

LA 1:500 (R) (PN)  
β Actin 1:1000  
(MW)  
(MW)

17M1

4.53  
R

4.98  
W

4.98  
R

Un-  
treated

WT LA

GFRA

LA

β Actin

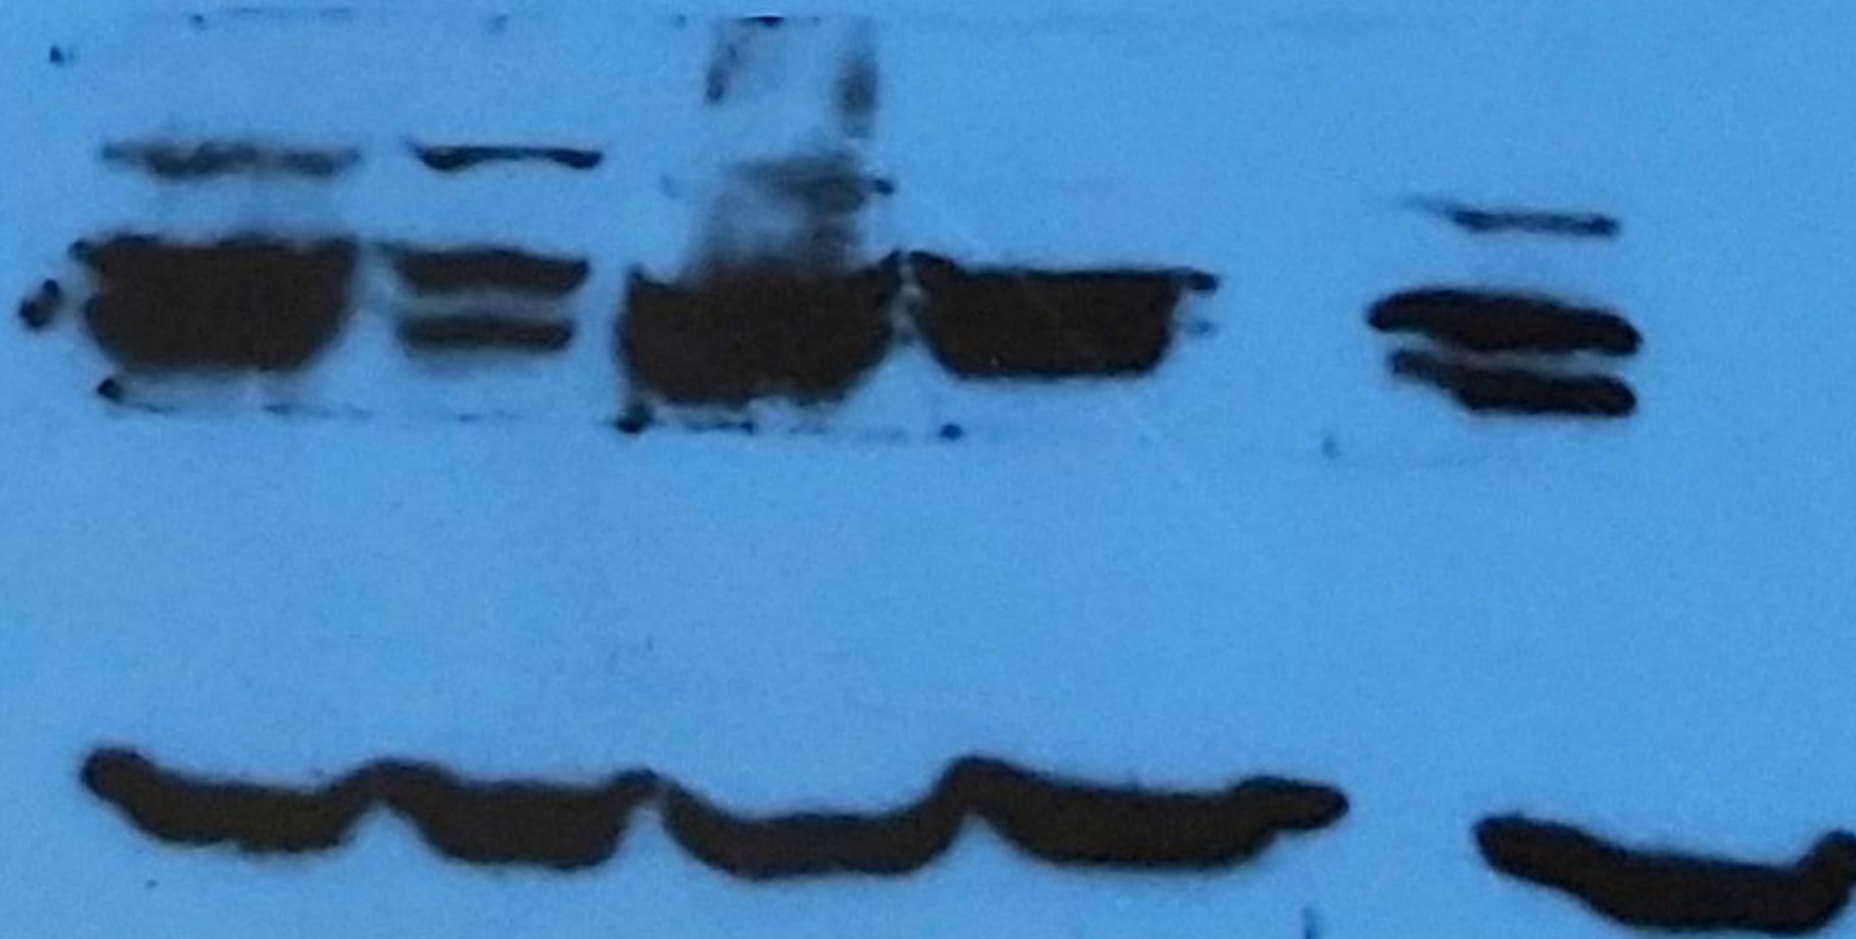

Supplement: d2ra05620h1.pdf [file d2ra05620h1.pdf]
